# Supplementary material
Source: ML conference proceedings conference paper supplement (https://proceedings.neurips.cc/paper_files/paper/2023/hash/37050ebbbd7096719ab96cec19a4c69f-Abstract.html)
Supplement: Supplementary file 1 [file 37050ebbbd7096719ab96cec19a4c69f-Supplemental-Conference.zip]

Archive with 2 entries (2 files):
- NeurIPS2023_CertifiedGCL__Camera_ appendix.pdf
- __MACOSX/._NeurIPS2023_CertifiedGCL__Camera_ appendix.pdf
